# Supplementary material for: Metabolic targets for cancer therapy
Source: Springer Nature journal article supplement (doi:10.1038/nrd4145), 2013-10-11
Supplement: 41573_2013_BFnrd4145_MOESM17_ESM.pdf [file 41573_2013_BFnrd4145_MOESM17_ESM.pdf]

**Supplemental Table 1 - Metabolic targets for cancer therapy**

| Targets                        | Pathways                  | Agents or approaches (company)*                        | Development stage                                                                          | Observations                                                                                                                                                        | Refs    |
|--------------------------------|---------------------------|--------------------------------------------------------|--------------------------------------------------------------------------------------------|---------------------------------------------------------------------------------------------------------------------------------------------------------------------|---------|
| <i>Bioenergetic metabolism</i> |                           |                                                        |                                                                                            |                                                                                                                                                                     |         |
| CPT1                           | $\beta$ oxidation         | Etomoxir<br>Oxfenicine<br>Perhexiline<br>RNAi          | Perhexiline is approved for use as an antianginal agent in Asia, Australia and New Zealand | Inhibition of CPT1 exerts anticancer effects <i>in vitro</i> and <i>in vivo</i> , yet it remains unclear whether these stem from the blockage of $\beta$ -oxidation | 1-3     |
| Complex I                      | Mitochondrial respiration | Metformin<br>Phenformin                                | Metformin is prescribed for the treatment of type 2 diabetes                               | The antineoplastic activity of metformin is independent of glycaemia and may reflect its capacity to inhibit mitochondrial respiration                              | 4,5     |
| GAPDH                          | Glycolysis                | 3-BP<br>Koningic acid                                  | Preclinical data                                                                           | In glycolytic cancer cells, GAPDH inhibition leads to ATP depletion and caspase-independent cell death, hence suppressing <i>in vivo</i> growth                     | 6,7     |
| GLUD1                          | Glutamine metabolism      | EGCG<br>RNAi                                           | EGCG is in clinical development                                                            | The safety and therapeutic potential of EGCG is being tested in cohorts of patients affected by multiple neoplasms                                                  | 8       |
| GLUT1                          | Glycolysis                | WZB117<br>RNAi                                         | Preclinical data                                                                           | Pharmacological or genetic inhibition of GLUT1 exerts antineoplastic effects, both <i>in vitro</i> and <i>in vivo</i>                                               | 9,10    |
| GLUT4                          | Glycolysis                | Dehydrosilybin<br>Silybin                              | Preclinical data                                                                           | Both these flavonoids reduce the viability of cultured cancer cells in a GLUT4-dependent manner                                                                     | 11      |
| GLS1                           | Glutamine metabolism      | 968<br>BPTES<br>RNAi                                   | Preclinical data                                                                           | Malignant cells expressing mutant IDH1 may be particularly sensitive to GLS1-targeting agents                                                                       | 12,13   |
| Glutamine                      | Glutamine metabolism      | Phenylacetate<br>Phenylbutyrate                        | Prescription drugs for the treatment of hyperammonaemia                                    | Phenylacetate rapidly reacts with circulating glutamine to form phenylacetylglutamine, which is readily excreted in urine                                           | 14      |
| HADHA                          | $\beta$ oxidation         | Ranolazine<br>Trimetazidine                            | Prescription drugs for the treatment of angina                                             | The actual antineoplastic potential of HADHA-targeting interventions remains to be elucidated                                                                       | 2,15,16 |
| Hexokinases                    | Glycolysis                | 2-DG<br>3-BP<br>Lonidamine<br>Methyl jasmonate<br>RNAi | The clinical development of 2-DG, 3-BP and lonidamine has been discontinued                | It remains to be determined whether the anticancer effects of 3-BP and lonidamine stem from the inhibition of HKs                                                   | 17-22   |

## SUPPLEMENTARY INFORMATION

|                            |                       |                                                                  |                                                                        |                                                                                                                                                                                                                                         |       |
|----------------------------|-----------------------|------------------------------------------------------------------|------------------------------------------------------------------------|-----------------------------------------------------------------------------------------------------------------------------------------------------------------------------------------------------------------------------------------|-------|
| LDHA                       | Glycolysis            | 3-BP<br>FX11<br>Galloflavin<br>RNAi                              | Preclinical data                                                       | Targeting LDHA limits <i>MYC</i> -driven carcinogenesis, and – coupled to NAMPT inhibitors – mediates robust antineoplastic effects <i>in vivo</i>                                                                                      | 23-25 |
| MCT1                       | TCA cycle             | AR-C155858<br>AR-C117977<br>AZD3965 (AstraZeneca)<br>CHC<br>RNAi | AZD3965 is in clinical development                                     | AZD3965 is currently being tested in a phase I clinical trial enrolling patients with advanced solid tumours; these agents may be incompatible with the use of MCT1-transported drugs, such as 3-BP                                     | 7,26  |
| MCT4                       | Glycolysis            | <i>CD44</i> RNAi<br><i>CD147</i> RNAi                            | Preclinical data                                                       | Silencing CD44 and/or CD147 results in the downregulation of MCT4 coupled to the inhibition of tumour progression                                                                                                                       | 27,28 |
| PC                         | TCA cycle             | RNAi                                                             | Preclinical data                                                       | Targeting PC exerts antineoplastic effects, especially when glutamine cannot be used by cancer cells                                                                                                                                    | 29    |
| PDK1                       | TCA cycle             | DCA                                                              | DCA is a prescription drug for the treatment of lactic acidosis        | DCA is well tolerated by patients with glioblastoma multiforme and provokes profound mitochondrial defects in cancer cells                                                                                                              | 30    |
| PDK2                       | TCA cycle             | AZD7545 (AstraZeneca)<br>Radicicol                               | Preclinical data                                                       | The anticancer effects of radicicol may be independent from its capacity to inhibit PDHK2, while the antineoplastic potential of AZD7545 remains entirely unexplored                                                                    | 31,32 |
| PFKFB3                     | Glycolysis            | 3PO<br>PFK15<br><i>Pfkfb3</i> <sup>+/-</sup> mice<br>RNAi        | Preclinical data                                                       | Inhibition of PFKFB3 exerts anticancer effects in tumour-bearing mice and prevents <i>HRAS</i> -driven carcinogenesis; in part, these effects may result from the ability of PFKFB3-targeting interventions to inhibit vessel sprouting | 33-36 |
| PKM2                       | Glycolysis            | TLN-232 (Thallion)<br>RNAi                                       | The clinical development of TLN-232 has been discontinued              | Inhibition of PKM2 reverses the Warburg effect (at least in some tumour models), yet may favour anabolism                                                                                                                               | 37-39 |
| <i>Anabolic metabolism</i> |                       |                                                                  |                                                                        |                                                                                                                                                                                                                                         |       |
| ACC                        | Lipid biosynthesis    | Sorafenib                                                        | Preclinical data                                                       | ACC inhibition blocks fatty acid synthesis and stimulates $\beta$ oxidation, thus limiting cancer cell growth <i>in vitro</i>                                                                                                           | 40    |
| ACLY                       | Lipid biosynthesis    | SB-204990 (SmithKline Beecham)<br>RNAi                           | Preclinical data                                                       | Irrespective of encouraging results, no ACLY inhibitor is currently being tested as an anticancer agent in clinical trials                                                                                                              | 41    |
| Arginine                   | Arginine metabolism   | Arginine deiminase (Polaris)                                     | Arginine deiminase is in clinical development                          | Intensively investigated for the treatment of several different tumours, with promising results                                                                                                                                         | 42,43 |
| Asparagine                 | Asparagine metabolism | <i>L</i> -asparaginase                                           | <i>L</i> -asparaginase is a prescription drug for the treatment of ALL | <i>L</i> -asparaginase reduces the circulating availability of asparagine, which is strictly required by some ALL types                                                                                                                 | 44    |

## SUPPLEMENTARY INFORMATION

|                 |                           |                                                    |                                                                                                      |                                                                                                                                                                                                  |       |
|-----------------|---------------------------|----------------------------------------------------|------------------------------------------------------------------------------------------------------|--------------------------------------------------------------------------------------------------------------------------------------------------------------------------------------------------|-------|
| CK              | Lipid biosynthesis        | CK37<br>TCD-717 (TCD Pharma)<br>RNAi               | TCD-717 is in clinical development                                                                   | The safety and therapeutic profile of TCD-717 is currently being tested in patients with advanced solid tumours                                                                                  | 45,46 |
| DHFR            | Folate metabolism         | Methotrexate<br>Pemetrexed                         | Methotrexate and pemetrexed are prescription drugs for the treatment of several tumours              | Methotrexate and pemetrexed are routinely used against various solid and haematological neoplasms                                                                                                | 47    |
| DNA polymerases | Nucleid acid synthesis    | Fludarabine<br>Gemcitabine                         | Fludarabine and gemcitabine are prescription drugs for the treatment of several tumours              | Fludarabine and gemcitabine are employed against haematological cancers and carcinomas, respectively                                                                                             | 47    |
| HMGCR           | Mevalonate pathway        | Statins                                            | Statins are prescription drugs against hypercholesterolemia                                          | The antineoplastic potential of statins is being investigated in multiple prospective clinical trials                                                                                            | 48,49 |
| IDHs            | Lipid biosynthesis        | AGI-5198 (Xcessbio)<br>AGI-6780 (Xcessbio)<br>RNAi | Preclinical data                                                                                     | Inhibition of both wild-type and mutant IDH results in multipronged antineoplastic effects, presumably reflecting a decrease in 2-HG levels as well as an interference with glutamine metabolism | 50-53 |
| FASN            | Lipid biosynthesis        | C75<br>C247<br>Orlistat                            | Orlistat can be purchased over-the-counter as a support for the dietary management of obesity        | In spite of promising preclinical data, no FASN inhibitor is being tested for its anticancer effects in clinical trials                                                                          | 54,55 |
| MGLL            | Lipid biosynthesis        | JZL184<br>RNAi                                     | Preclinical data                                                                                     | MGLL promotes migration, invasion and survival of malignant cells, as well as <i>in vivo</i> tumour growth                                                                                       | 56    |
| PGAM1           | PPP                       | PGMI-004A<br>RNAi                                  | Preclinical data                                                                                     | Pharmacological or genetic inhibition of PGAM1 attenuates tumour growth <i>in vitro</i> and <i>in vivo</i> , presumably owing to the 3PG-mediated inhibition of the PPP                          | 57    |
| PHGDH           | Anaplerosis               | RNAi                                               | Preclinical data                                                                                     | PHGDH inhibition fails to affect serine availability, yet limits that of multiple intermediates of the TCA cycle                                                                                 | 58,59 |
| PKM2            | PPP                       | TEPP-46<br>SAICAR<br>Serine                        | Preclinical data                                                                                     | PKM2 activators reportedly limit the diversion of glucose towards the PPP, hence mediating antitumour effects                                                                                    | 60-63 |
| RNR             | Deoxynucleotide synthesis | Fludarabine<br>Gemcitabine<br>Hydroxyurea          | Fludarabine, gemcitabine and hydroxyurea are prescription drugs for the treatment of several tumours | Hydroxyurea is currently employed for the treatment of myeloproliferative disorders, psoriasis and CML                                                                                           | 47    |
| TKTL1           | PPP                       | RNAi                                               | Preclinical data                                                                                     | Depletion of TKTL1 limits the proliferation of gastric cancer cells <i>in vitro</i> and <i>in vivo</i>                                                                                           | 64    |
| TYMS            | Thymidine synthesis       | 5-FU                                               | Prescription drug for the treatment of several tumours                                               | 5-FU is routinely employed for the treatment of colorectal, pancreatic and breast carcinoma                                                                                                      | 47    |

## SUPPLEMENTARY INFORMATION

| <i>Other metabolic circuitries</i> |                             |                                    |                                                                                                       |                                                                                                                      |       |
|------------------------------------|-----------------------------|------------------------------------|-------------------------------------------------------------------------------------------------------|----------------------------------------------------------------------------------------------------------------------|-------|
| CAs                                | Extracellular pH regulation | Acetazolamide<br>Indisulam<br>RNAi | Acetazolamide is a prescription drug for the treatment of glaucoma and several neurological disorders | Inhibition of CAs results in the normalization of extracellular pH, therefore limiting local invasion and metastasis | 65    |
| CPT1                               | NADPH metabolism            | Etomoxir<br>RNAi                   | Preclinical data                                                                                      | Inhibition of CPT1 results in the accumulation of ROS, ATP depletion and cell death                                  | 1-3   |
| HIF-1                              | Hypoxic responses           | Acriflavine<br>PX-478              | Preclinical data                                                                                      | Most, if not all, HIF-1-targeting agents have failed (or never reached) clinical development                         | 66    |
| IDO                                | Tryptophan metabolism       | RNAi                               | Preclinical data                                                                                      | IDO-derived kynurenine promotes tumour progression via cell-intrinsic and cell-extrinsic mechanisms                  | 67    |
| mTOR                               | Cell growth<br>Autophagy    | Rapalogues<br>Torins               | Rapalogues are prescription drugs for the treatment of graft rejection and several tumours            | Although mTOR inhibitors may limit tumour growth, they may also favour chemoresistance or neocarcinogenesis          | 68,69 |
| NAMPT                              | NADH metabolism             | FK866                              | Clinical development<br>Preclinical data                                                              | Associated with dose-limiting thrombocytopenic effects                                                               | 70-72 |
| NHE1                               | Extracellular pH regulation | Amiloride<br>Cariporide<br>RNAi    | Amiloride is a prescription drug for the treatment of hypertension and congestive heart failure       | Clinical development of cariporide has been stopped owing to an unexpected incidence of stroke                       | 65    |
| PTGS2<br>AMPK?                     | Cell growth<br>Autophagy    | Aspirin                            | Over-the-counter non-steroidal anti-inflammatory drug                                                 | Although aspirin has been shown to activate AMPK, its antineoplastic activity appears to stem from on-target effects | 73-75 |

2-DG, 2-deoxy-*D*-glucose; 2-HG, *R*(-)-2-hydroxyglutarate; 3-BP, 3-bromopyruvate; 3PG, 3-phosphoglycerate; 3PO, 3-(3-pyridinyl)-1-(4-pyridinyl)-2-propen-1-one; 5-FU, 5-fluorouracil; 968, 5-[3-bromo-4-(dimethylamino)phenyl]-2,2-dimethyl-2,3,5,6-tetrahydrobenzo[*a*]; ACC, acetyl-CoA carboxylase; ACLY, ATP-citrate lyase; ALL, acute lymphoblastic leukaemia; AMPK, 5'-AMP-activated protein kinase; BPTES, bis-2-(5-phenylacetamido-1,2,4-thiadiazol-2-yl)ethyl sulfide; C75, 4-methylene-2-octyl-5-oxotetrahydrofuran-3-carboxylic acid; CA, carbonic anhydrase; CHC,  $\alpha$ -cyano-4-hydroxycinnamate; CK, choline kinase; CK37, *N*-(3,5-dimethylphenyl)-2-[[5-(4-ethylphenyl)-1H-1,2,4-triazol-3-yl]sulfanyl] acetamide; CML, chronic myelogenous leukaemia; CPT1, carnitine palmitoyltransferase I; DCA, dichloroacetate; DHFR, dihydrofolate reductase; EGCG, epigallocatechin gallate; FASN, fatty acid synthase; FK866, *N*-[4-(1-benzoyl-4-piperidinyl)butyl]-3-(3-pyridinyl)-2E-propenamide; FX11, 3-dihydroxy-6-methyl-7-(phenylmethyl)-4-propylnaphthalene-1-carboxylic acid; GAPDH, glyceraldehyde-3-phosphate dehydrogenase; GBM, glioblastoma multiforme; GLS1, glutaminase 1; GLUD1, glutamate dehydrogenase 1; GLUT, glucose transporter; HADHA, trifunctional protein,  $\alpha$  subunit; HIF-1, hypoxia-inducible factor 1; HK, hexokinase; HMGCR, 3-hydroxy-3-methyl-glutaryl-CoA reductase; IDH, isocitrate dehydrogenase; IDO, indoleamine-2,3-dioxygenase; JZL184, 4-nitrophenyl-4-[bis(1,3-benzodioxol-5-yl)(hydroxy)methyl]piperidine-1-carboxylate; LDHA, lactate dehydrogenase A; MCT, monocarboxylate transporter; MGLL, monoacylglycerol lipase; mTOR, mammalian target of rapamycin; NAMPT, nicotinamide phosphoribosyltransferase; TEPP-46, 6-[(3-aminophenyl)methyl]-4,6-dihydro-4-methyl-2-(methylsulfinyl)-5h-thieno[2',3':4,5]pyrrolo[2,3-*d*]pyridazin-5-one; NHE1, Na<sup>+</sup>/H<sup>+</sup> exchanger 1; PC, pyruvate carboxylase; PDK1, pyruvate dehydrogenase kinase 1;

## SUPPLEMENTARY INFORMATION

PDK2, pyruvate dehydrogenase kinase 2; PFK15, 1-(4-pyridinyl)-3-(2-quinolinyl)-2-propen-1-one; PFKFB3, 6-phosphofructo-2-kinase/fructose-2,6-biphosphatase 3; PGAM1, phosphoglycerate mutase 1; PGMI-004A, PGAM1 inhibitor 004A; PHGDH, phosphoglycerate dehydrogenase; PKM2, pyruvate kinase, muscle, M2 isoform; PPP, pentose phosphate pathway; PTGS2, prostaglandin-endoperoxide synthase 2; PX-478, S-2-amino-3-[4'-N,N,-bis(2-chloroethyl)amino]phenyl propionic acid N-oxide dihydrochloride; RNAi, RNA interference; RNR, ribonucleotide reductase; ROS, reactive oxygen species; SAICAR, succinylaminoimidazolecarboxamide ribose-5'-phosphate; SB-204990, (2R)-2-[(2S)-8-(2,4-dichlorophenyl)-2-hydroxyoctyl]-2-hydroxybutanedioic acid; TCA, tricarboxylic acid; TKTL1, transketolase-like protein 1; TLN-232, *D*-Phe-Cys-*D*-Trp-Lys-Cys-Thr-NH<sub>2</sub>; TYMS, thymidylate synthase; WZB117, 3-hydroxy-benzoic acid 1,1'-(3-fluoro-1,2-phenylene) ester. \*Where company name is not indicated, this is not applicable, the agent is an academic compound or it is a generic drug.

References

1. Pike, L. S., Smift, A. L., Croteau, N. J., Ferrick, D. A. & Wu, M. Inhibition of fatty acid oxidation by etomoxir impairs NADPH production and increases reactive oxygen species resulting in ATP depletion and cell death in human glioblastoma cells. *Biochimica et biophysica acta* **1807**, 726-734 (2011).
2. Samudio, I. *et al.* Pharmacologic inhibition of fatty acid oxidation sensitizes human leukemia cells to apoptosis induction. *The Journal of clinical investigation* **120**, 142-156 (2010).
3. Zaugg, K. *et al.* Carnitine palmitoyltransferase 1C promotes cell survival and tumor growth under conditions of metabolic stress. *Genes Dev* **25**, 1041-1051 (2011).
4. Foretz, M. *et al.* Metformin inhibits hepatic gluconeogenesis in mice independently of the LKB1/AMPK pathway via a decrease in hepatic energy state. *The Journal of clinical investigation* **120**, 2355-2369 (2010).
5. El-Mir, M. Y. *et al.* Dimethylbiguanide inhibits cell respiration via an indirect effect targeted on the respiratory chain complex I. *The Journal of biological chemistry* **275**, 223-228 (2000).
6. Kumagai, S., Narasaki, R. & Hasumi, K. Glucose-dependent active ATP depletion by koniginic acid kills high-glycolytic cells. *Biochem Biophys Res Commun* **365**, 362-368 (2008).
7. Birsoy, K. *et al.* MCT1-mediated transport of a toxic molecule is an effective strategy for targeting glycolytic tumors. *Nat Genet* **45**, 104-108 (2013).
8. Yang, C. *et al.* Glioblastoma cells require glutamate dehydrogenase to survive impairments of glucose metabolism or Akt signaling. *Cancer Res* **69**, 7986-7993 (2009).
9. Liu, Y. *et al.* A small-molecule inhibitor of glucose transporter 1 downregulates glycolysis, induces cell-cycle arrest, and inhibits cancer cell growth in vitro and in vivo. *Molecular cancer therapeutics* **11**, 1672-1682 (2012).
10. Gautier, E. L. *et al.* HDL and Glut1 inhibition reverse a hypermetabolic state in mouse models of myeloproliferative disorders. *J Exp Med* **210**, 339-353 (2013).
11. Zhan, T., Digel, M., Kuch, E. M., Stremmel, W. & Fullekrug, J. Silybin and dehydrosilybin decrease glucose uptake by inhibiting GLUT proteins. *Journal of cellular biochemistry* **112**, 849-859 (2011).
12. Wang, J. B. *et al.* Targeting mitochondrial glutaminase activity inhibits oncogenic transformation. *Cancer Cell* **18**, 207-219 (2010).
13. Seltzer, M. J. *et al.* Inhibition of glutaminase preferentially slows growth of glioma cells with mutant IDH1. *Cancer Res* **70**, 8981-8987 (2010).
14. Enns, G. M. *et al.* Survival after treatment with phenylacetate and benzoate for urea-cycle disorders. *The New England journal of medicine* **356**, 2282-2292 (2007).
15. Andela, V. B., Altuwaijri, S., Wood, J. & Rosier, R. N. Inhibition of beta-oxidative respiration is a therapeutic window associated with the cancer chemo-preventive activity of PPARGgamma agonists. *FEBS letters* **579**, 1765-1769 (2005).
16. Suckow, M. A. *et al.* The anti-ischemia agent ranolazine promotes the development of intestinal tumors in APC(Min/+) mice. *Cancer letters* **209**, 165-169 (2004).
17. Dwarakanath, B. S. *et al.* Clinical studies for improving radiotherapy with 2-deoxy-D-glucose: present status and future prospects. *Journal of cancer research and therapeutics* **5 Suppl 1**, S21-26 (2009).
18. Goldin, N. *et al.* Methyl jasmonate binds to and detaches mitochondria-bound hexokinase. *Oncogene* **27**, 4636-4643 (2008).
19. Jae, H. J. *et al.* The antitumor effect and hepatotoxicity of a hexokinase II inhibitor 3-bromopyruvate: in vivo investigation of intraarterial administration in a rabbit VX2 hepatoma model. *Korean journal of radiology : official journal of the Korean Radiological Society* **10**, 596-603 (2009).
20. Vander Heiden, M. G. Targeting cancer metabolism: a therapeutic window opens. *Nat Rev Drug Discov* **10**, 671-684 (2011).
21. Hamanaka, R. B. & Chandel, N. S. Targeting glucose metabolism for cancer therapy. *J Exp Med* **209**, 211-215 (2012).
22. Wolf, A. *et al.* Hexokinase 2 is a key mediator of aerobic glycolysis and promotes tumor growth in human glioblastoma multiforme. *J Exp Med* **208**, 313-326 (2011).
23. Shim, H. *et al.* c-Myc transactivation of LDH-A: implications for tumor metabolism and growth. *Proceedings of the National Academy of Sciences of the United States of America* **94**, 6658-6663 (1997).
24. Le, A. *et al.* Inhibition of lactate dehydrogenase A induces oxidative stress and inhibits tumor progression. *Proceedings of the National Academy of Sciences of the United States of America* **107**, 2037-2042 (2010).

## SUPPLEMENTARY INFORMATION

25. Shoshan, M. C. 3-Bromopyruvate: targets and outcomes. *Journal of bioenergetics and biomembranes* **44**, 7-15 (2012).
26. Sonveaux, P. *et al.* Targeting lactate-fueled respiration selectively kills hypoxic tumor cells in mice. *The Journal of clinical investigation* **118**, 3930-3942 (2008).
27. Schneiderhan, W. *et al.* CD147 silencing inhibits lactate transport and reduces malignant potential of pancreatic cancer cells in in vivo and in vitro models. *Gut* **58**, 1391-1398 (2009).
28. Hao, J. *et al.* In vitro and in vivo prostate cancer metastasis and chemoresistance can be modulated by expression of either CD44 or CD147. *PLoS one* **7**, e40716 (2012).
29. Cheng, T. *et al.* Pyruvate carboxylase is required for glutamine-independent growth of tumor cells. *Proceedings of the National Academy of Sciences of the United States of America* **108**, 8674-8679 (2011).
30. Michelakis, E. D., Webster, L. & Mackey, J. R. Dichloroacetate (DCA) as a potential metabolic-targeting therapy for cancer. *British journal of cancer* **99**, 989-994 (2008).
31. Li, J., Kato, M. & Chuang, D. T. Pivotal role of the C-terminal DW-motif in mediating inhibition of pyruvate dehydrogenase kinase 2 by dichloroacetate. *The Journal of biological chemistry* **284**, 34458-34467 (2009).
32. Oikawa, T. *et al.* Dipalmitoylation of radicicol results in improved efficacy against tumor growth and angiogenesis in vivo. *Cancer science* **98**, 219-225 (2007).
33. Clem, B. *et al.* Small-molecule inhibition of 6-phosphofructo-2-kinase activity suppresses glycolytic flux and tumor growth. *Molecular cancer therapeutics* **7**, 110-120 (2008).
34. Telang, S. *et al.* Ras transformation requires metabolic control by 6-phosphofructo-2-kinase. *Oncogene* **25**, 7225-7234 (2006).
35. Clem, B. F. *et al.* Targeting 6-phosphofructo-2-kinase (PFKFB3) as a therapeutic strategy against cancer. *Molecular cancer therapeutics* **12**, 1461-1470 (2013).
36. De Bock, K. *et al.* Role of PFKFB3-driven glycolysis in vessel sprouting. *Cell* **154**, 651-663 (2013).
37. Goldberg, M. S. & Sharp, P. A. Pyruvate kinase M2-specific siRNA induces apoptosis and tumor regression. *J Exp Med* **209**, 217-224 (2012).
38. Christofk, H. R. *et al.* The M2 splice isoform of pyruvate kinase is important for cancer metabolism and tumour growth. *Nature* **452**, 230-233 (2008).
39. Vander Heiden, M. G. *et al.* Identification of small molecule inhibitors of pyruvate kinase M2. *Biochemical pharmacology* **79**, 1118-1124 (2010).
40. Beckers, A. *et al.* Chemical inhibition of acetyl-CoA carboxylase induces growth arrest and cytotoxicity selectively in cancer cells. *Cancer Res* **67**, 8180-8187 (2007).
41. Hatzivassiliou, G. *et al.* ATP citrate lyase inhibition can suppress tumor cell growth. *Cancer Cell* **8**, 311-321 (2005).
42. Ott, P. A. *et al.* Phase I/II study of pegylated arginine deiminase (ADI-PEG 20) in patients with advanced melanoma. *Investigational new drugs* **31**, 425-434 (2013).
43. Yang, T. S. *et al.* A randomised phase II study of pegylated arginine deiminase (ADI-PEG 20) in Asian advanced hepatocellular carcinoma patients. *British journal of cancer* **103**, 954-960 (2010).
44. Muller, H. J. & Boos, J. Use of L-asparaginase in childhood ALL. *Critical reviews in oncology/hematology* **28**, 97-113 (1998).
45. Clem, B. F. *et al.* A novel small molecule antagonist of choline kinase-alpha that simultaneously suppresses MAPK and PI3K/AKT signaling. *Oncogene* **30**, 3370-3380 (2011).
46. Yalcin, A. *et al.* Selective inhibition of choline kinase simultaneously attenuates MAPK and PI3K/AKT signaling. *Oncogene* **29**, 139-149 (2010).
47. Chabner, B. A. & Roberts, T. G., Jr. Timeline: Chemotherapy and the war on cancer. *Nat Rev Cancer* **5**, 65-72 (2005).
48. Nielsen, S. F., Nordestgaard, B. G. & Bojesen, S. E. Statin use and reduced cancer-related mortality. *The New England journal of medicine* **367**, 1792-1802 (2012).
49. Cao, Z. *et al.* MYC phosphorylation, activation, and tumorigenic potential in hepatocellular carcinoma are regulated by HMG-CoA reductase. *Cancer Res* **71**, 2286-2297 (2011).
50. Dang, L. *et al.* Cancer-associated IDH1 mutations produce 2-hydroxyglutarate. *Nature* **462**, 739-744 (2009).

## SUPPLEMENTARY INFORMATION

51. Wang, F. *et al.* Targeted inhibition of mutant IDH2 in leukemia cells induces cellular differentiation. *Science* **340**, 622-626 (2013).
52. Ward, P. S. *et al.* The common feature of leukemia-associated IDH1 and IDH2 mutations is a neomorphic enzyme activity converting alpha-ketoglutarate to 2-hydroxyglutarate. *Cancer Cell* **17**, 225-234 (2010).
53. Rohle, D. *et al.* An inhibitor of mutant IDH1 delays growth and promotes differentiation of glioma cells. *Science* **340**, 626-630 (2013).
54. Alli, P. M., Pinn, M. L., Jaffee, E. M., McFadden, J. M. & Kuhajda, F. P. Fatty acid synthase inhibitors are chemopreventive for mammary cancer in neu-N transgenic mice. *Oncogene* **24**, 39-46 (2005).
55. Seguin, F. *et al.* The fatty acid synthase inhibitor orlistat reduces experimental metastases and angiogenesis in B16-F10 melanomas. *British journal of cancer* **107**, 977-987 (2012).
56. Nomura, D. K. *et al.* Monoacylglycerol lipase regulates a fatty acid network that promotes cancer pathogenesis. *Cell* **140**, 49-61 (2010).
57. Hitosugi, T. *et al.* Phosphoglycerate mutase 1 coordinates glycolysis and biosynthesis to promote tumor growth. *Cancer Cell* **22**, 585-600 (2012).
58. Locasale, J. W. *et al.* Phosphoglycerate dehydrogenase diverts glycolytic flux and contributes to oncogenesis. *Nat Genet* **43**, 869-874 (2011).
59. Possemato, R. *et al.* Functional genomics reveal that the serine synthesis pathway is essential in breast cancer. *Nature* **476**, 346-350 (2011).
60. Anastasiou, D. *et al.* Pyruvate kinase M2 activators promote tetramer formation and suppress tumorigenesis. *Nature chemical biology* **8**, 839-847 (2012).
61. Chaneton, B. *et al.* Serine is a natural ligand and allosteric activator of pyruvate kinase M2. *Nature* **491**, 458-462 (2012).
62. Keller, K. E., Tan, I. S. & Lee, Y. S. SAICAR stimulates pyruvate kinase isoform M2 and promotes cancer cell survival in glucose-limited conditions. *Science* **338**, 1069-1072 (2012).
63. Kung, C. *et al.* Small molecule activation of PKM2 in cancer cells induces serine auxotrophy. *Chemistry & biology* **19**, 1187-1198 (2012).
64. Yuan, W. *et al.* Silencing of TKTL1 by siRNA inhibits proliferation of human gastric cancer cells in vitro and in vivo. *Cancer biology & therapy* **9**, 710-716 (2010).
65. Neri, D. & Supuran, C. T. Interfering with pH regulation in tumours as a therapeutic strategy. *Nat Rev Drug Discov* **10**, 767-777 (2011).
66. Wilson, W. R. & Hay, M. P. Targeting hypoxia in cancer therapy. *Nat Rev Cancer* **11**, 393-410 (2011).
67. Opitz, C. A. *et al.* An endogenous tumour-promoting ligand of the human aryl hydrocarbon receptor. *Nature* **478**, 197-203 (2011).
68. Sabatini, D. M. mTOR and cancer: insights into a complex relationship. *Nat Rev Cancer* **6**, 729-734 (2006).
69. Benjamin, D., Colombi, M., Moroni, C. & Hall, M. N. Rapamycin passes the torch: a new generation of mTOR inhibitors. *Nat Rev Drug Discov* **10**, 868-880 (2011).
70. Bajrami, I. *et al.* Synthetic lethality of PARP and NAMPT inhibition in triple-negative breast cancer cells. *EMBO molecular medicine* **4**, 1087-1096 (2012).
71. Okumura, S., Sasaki, T., Minami, Y. & Ohsaki, Y. Nicotinamide phosphoribosyltransferase: a potent therapeutic target in non-small cell lung cancer with epidermal growth factor receptor-gene mutation. *Journal of thoracic oncology : official publication of the International Association for the Study of Lung Cancer* **7**, 49-56 (2012).
72. Holen, K., Saltz, L. B., Hollywood, E., Burk, K. & Hanauske, A. R. The pharmacokinetics, toxicities, and biologic effects of FK866, a nicotinamide adenine dinucleotide biosynthesis inhibitor. *Investigational new drugs* **26**, 45-51 (2008).
73. Hawley, S. A. *et al.* The ancient drug salicylate directly activates AMP-activated protein kinase. *Science* **336**, 918-922 (2012).
74. Chan, A. T., Ogino, S. & Fuchs, C. S. Aspirin and the risk of colorectal cancer in relation to the expression of COX-2. *The New England journal of medicine* **356**, 2131-2142 (2007).
75. Liao, X. *et al.* Aspirin use, tumor PIK3CA mutation, and colorectal-cancer survival. *The New England journal of medicine* **367**, 1596-1606 (2012).
